# Supplementary material for: γ-CD-MOF-derived heterostructures as bifunctional electrocatalysts for rechargeable zinc–air batteries
Source: Royal Society of Chemistry journal article supplement (doi:10.1039/d3se00011g), 2023-01-01
Supplement: d3se00011g1.pdf [file d3se00011g1.pdf]

## Supplementary Information

### $\gamma$ -CD-MOF-Derived Heterostructure as Bifunctional Electrocatalyst for Rechargeable Zinc-Air Batteries

Ruirui Chai, Xinxin Sang\*, Shiguo Ou, Jiahao Li, Junling Song, Dawei Wang\*

Key Laboratory of Synthetic and Biological Colloids, Ministry of Education, School of Chemical  
and Material Engineering, Jiangnan University, Wuxi 214122, Jiangsu Province, China.

E-mail: sangxx@jiangnan.edu.cn, wangdw@jiangnan.edu.cn

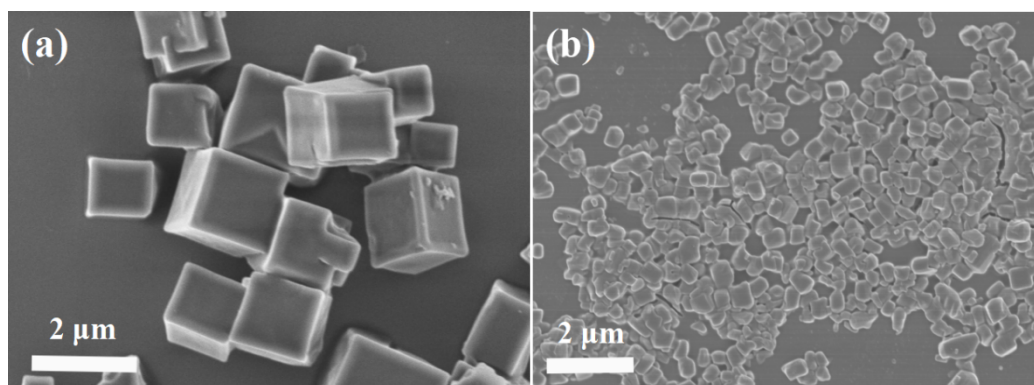

Fig. S1. SEM images of (a)  $\gamma$ -CD-MOF. (b) Co-CD-MOF.

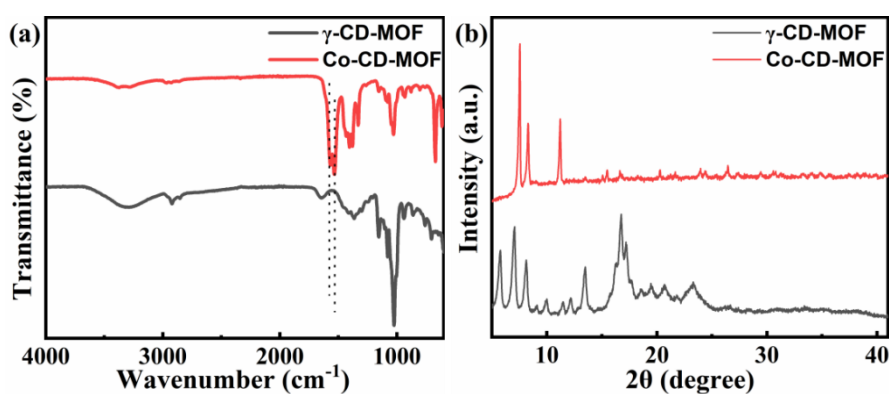

Fig. S2. (a) FT-IR spectra and (b) XRD patterns of  $\gamma$ -CD-MOF and Co-CD-MOF.

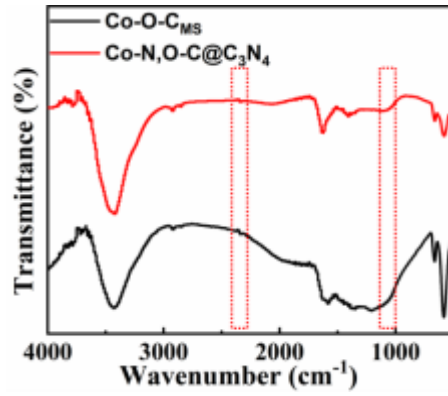

Fig. S3. FT-IR spectra of Co-O-C<sub>MS</sub> and Co-N,O-C@C<sub>3</sub>N<sub>4</sub>.

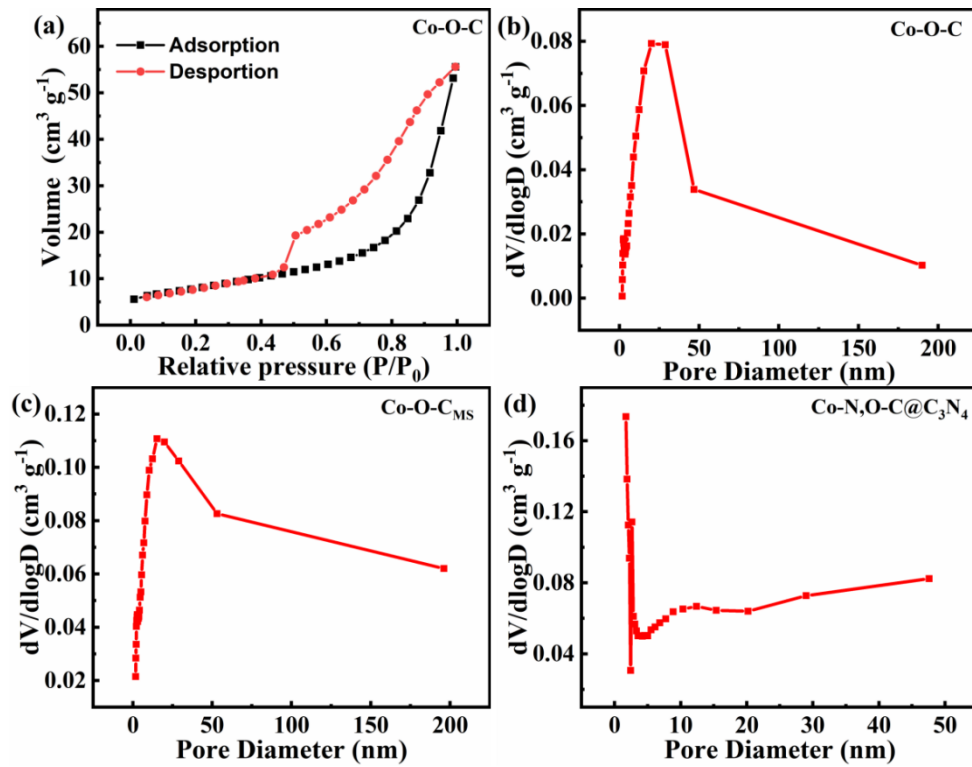

Fig. S4. (a) Nitrogen adsorption-desorption isotherms and (b) pore distribution curve of Co-O-C; Pore distribution curve of (c) Co-O-C<sub>MS</sub> and (d) Co-N,O-C@C<sub>3</sub>N<sub>4</sub>.

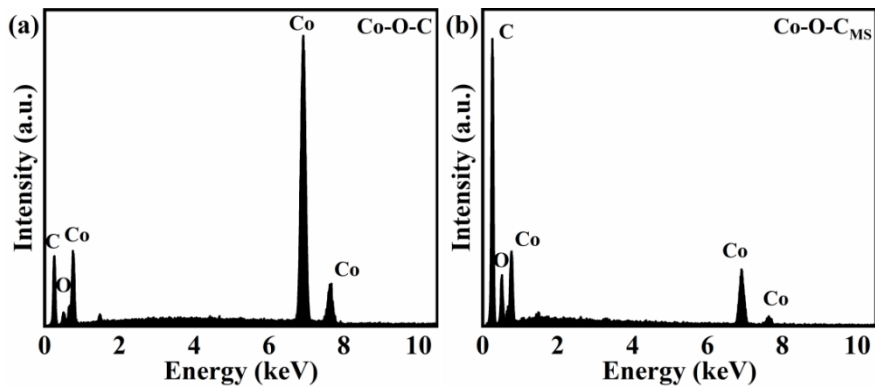

Fig. S5. EDS spectra of (a) Co-O-C and (b) Co-O-C<sub>MS</sub>.

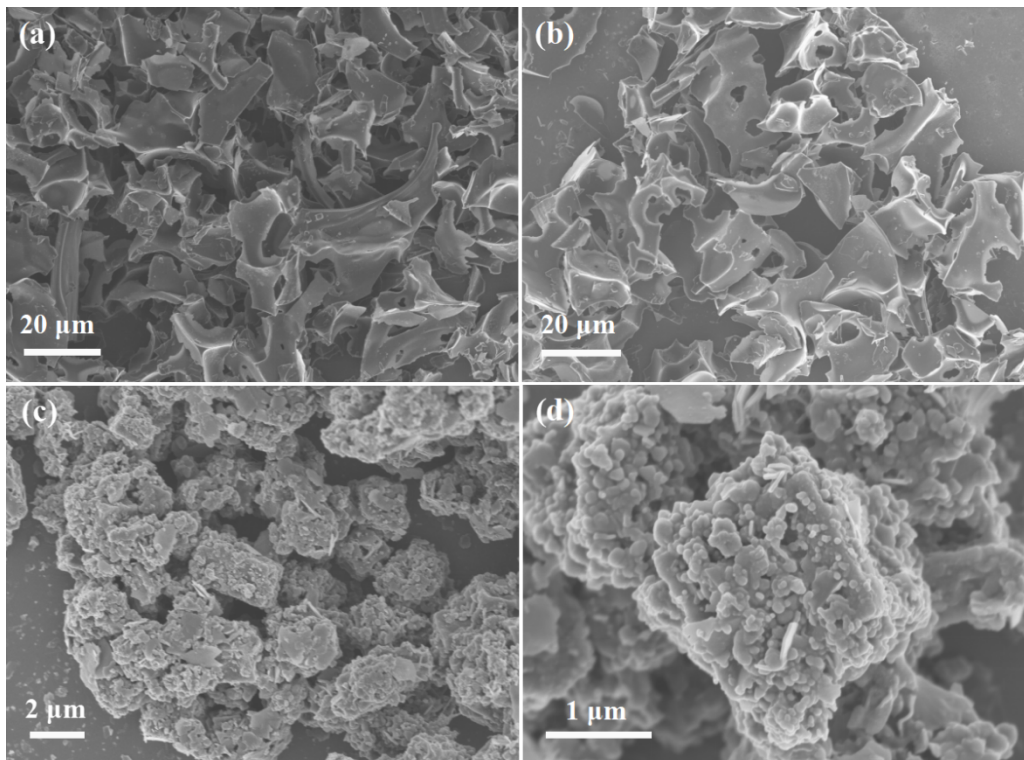

Fig. S6. SEM images of (a,b) Co-O-C and (c,d) Co-O-C<sub>MS</sub>.

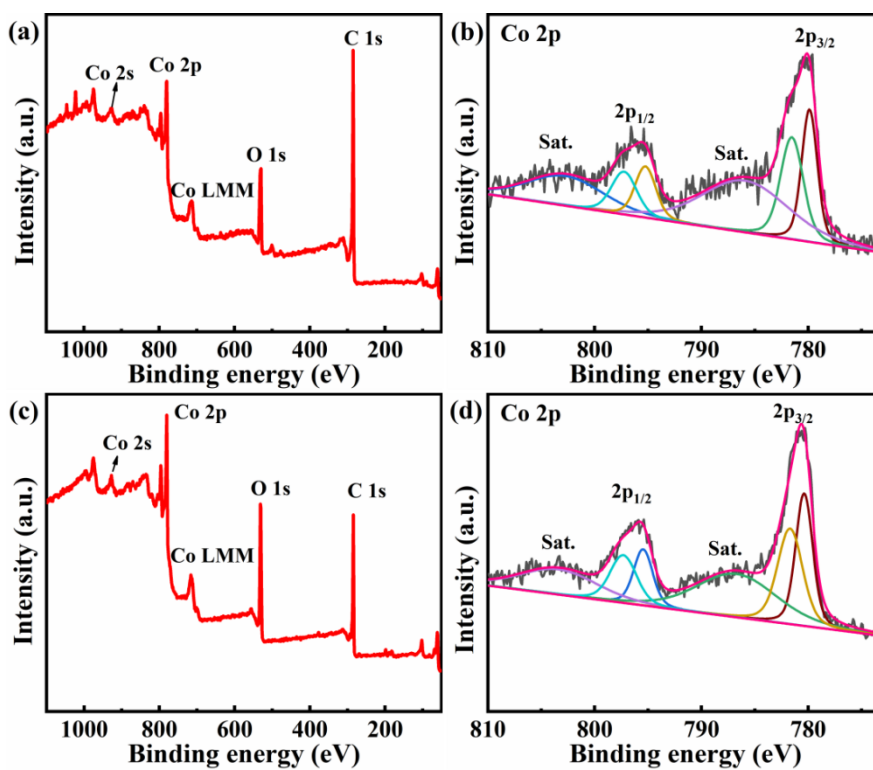

Fig. S7. (a,c) XPS survey spectra of Co-O-C and Co-O-C<sub>MS</sub>, and (b,d) the corresponding high-resolution of Co 2p spectra.

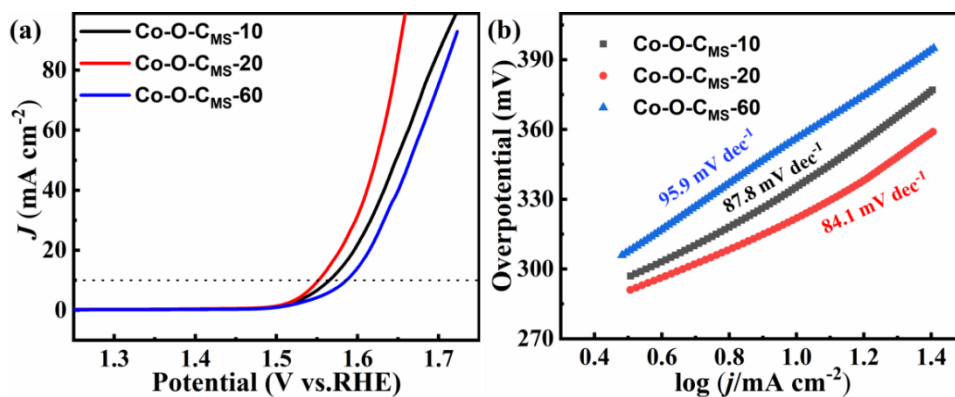

Fig. S8. (a) OER polarization curves and (b) Tafel slopes of Co-O-C<sub>MS</sub> with different molten salt ratio.

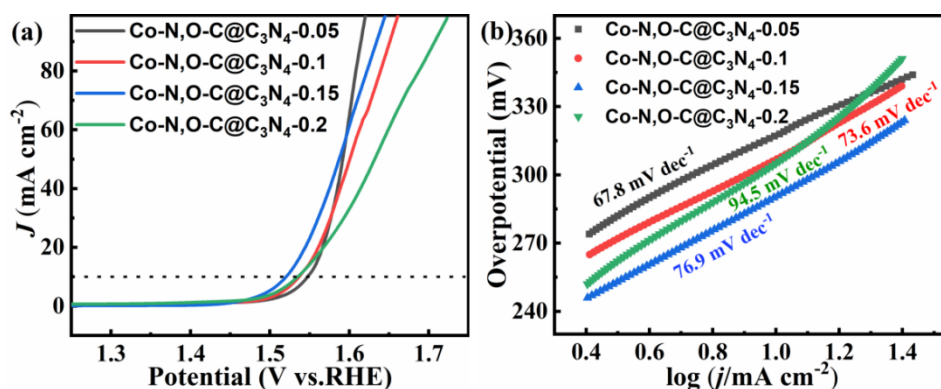

Fig. S9. (a) OER polarization curves and (b) Tafel slopes of Co-N,O-C@C<sub>3</sub>N<sub>4</sub> with different melamine addition.

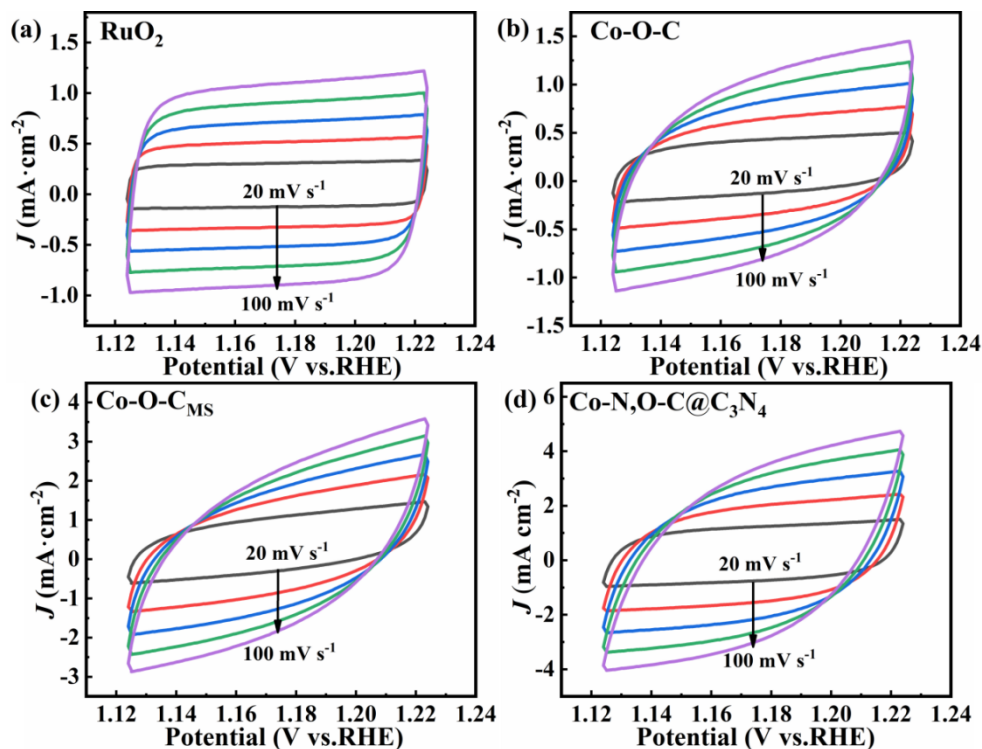

Fig. S10. CV curves of (a) RuO<sub>2</sub>, (b) Co-O-C, (c) Co-O-C<sub>MS</sub> and (d) Co-N,O-C@C<sub>3</sub>N<sub>4</sub> at different sweeping rates from 20 mV s<sup>-1</sup> to 100 mV s<sup>-1</sup> in 1 M KOH.

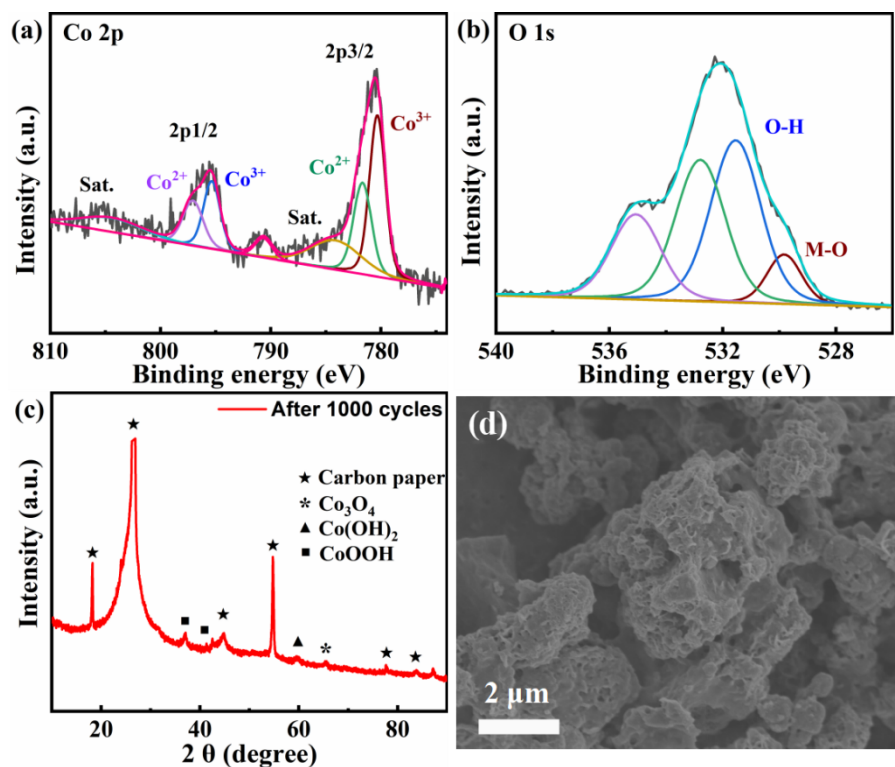

Fig. S11. (a) Co 2p and (b) O 1s spectra, (c) XRD and (d) SEM image of Co-N,O-C@C<sub>3</sub>N<sub>4</sub> after 1000 CVs OER durability.

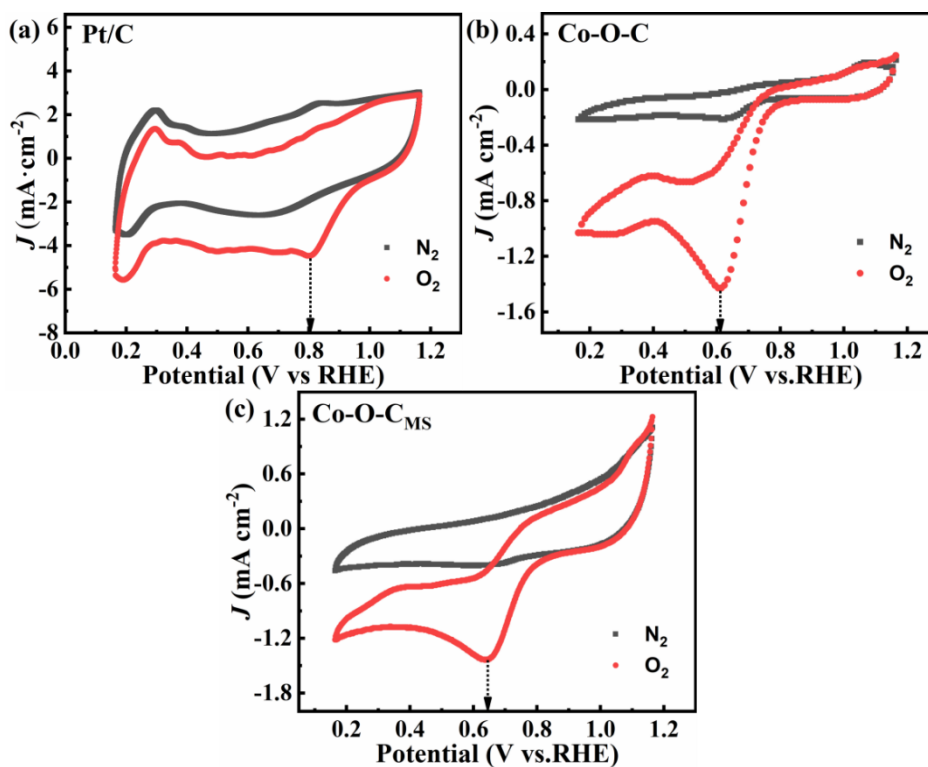

Fig. S12. CV curves of (a) Pt/C, (b) Co-O-C and (c) Co-O-C<sub>MS</sub> in N<sub>2</sub> and O<sub>2</sub>-saturated 0.1 M

KOH.

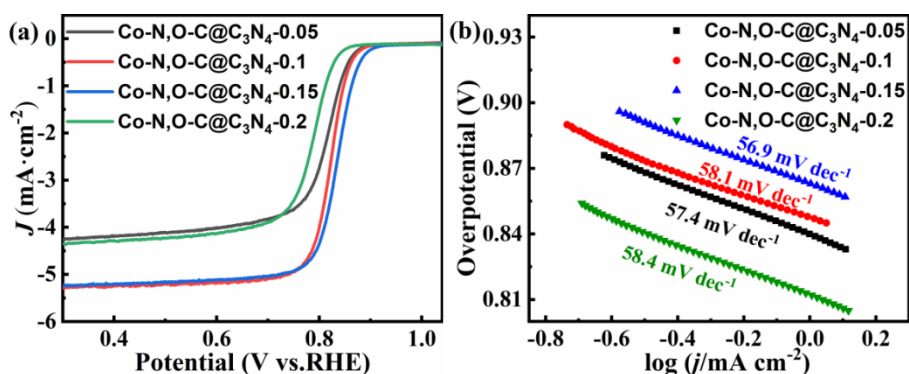

**Fig. S13.** (a) ORR polarization curves and (b) Tafel slopes of Co-N,O-C@C<sub>3</sub>N<sub>4</sub> with different melamine addition.

**Table S1** Sample composition based on XPS results

| Sample | Co-O-C <sub>MS</sub> (atomic%) | Co-N,O-C@C <sub>3</sub> N <sub>4</sub> (atomic%) |
|--------|--------------------------------|--------------------------------------------------|
| Co 2p  | 8.14                           | 6.87                                             |
| C 1s   | 68.84                          | 70.95                                            |
| N 1s   | -                              | 1.38                                             |
| O 1s   | 23.02                          | 20.80                                            |

**Table S2** Comparison of the OER performances of Co-N,O-C@C<sub>3</sub>N<sub>4</sub> with reported catalysts.

| Catalyst                               | Overpotential/<br>mV<br>(10 mA cm <sup>-2</sup> ) | Tafel slope<br>(mV dec <sup>-1</sup> ) | Mass loading<br>(mg cm <sup>-2</sup> ) | Reference |
|----------------------------------------|---------------------------------------------------|----------------------------------------|----------------------------------------|-----------|
| Co-N,O-C@C <sub>3</sub> N <sub>4</sub> | 290                                               | 76.9                                   | 0.39                                   | This work |
| Co <sub>3</sub> N@AN-C NCs             | 280                                               | 69.6                                   | 2.6                                    | 1         |
| Co/HNCP                                | 383                                               | 81                                     | 0.204                                  | 2         |
| Co/CNFs (1000)                         | 320                                               | 79                                     | 0.3                                    | 3         |
| Co <sub>2</sub> P/Co-Foil              | 319                                               | 79                                     | -                                      | 4         |

|                                       |     |       |       |    |
|---------------------------------------|-----|-------|-------|----|
| Co@N-CNTF                             | 350 | 61.4  | 0.28  | 5  |
| Co/CoO@NC@CC                          | 284 | 76    | 0.19  | 6  |
| S-CoO/Co <sub>3</sub> O <sub>4</sub>  | 275 | 92    | 0.38  | 7  |
| CoO <sub>x</sub> -ZIF/C               | 318 | 70.3  | 0.194 | 8  |
| Co <sub>3</sub> O <sub>4</sub> @C-TMA | 320 | 85.18 | 0.15  | 9  |
| Co@HOPC                               | 320 | 31.2  | 0.2   | 10 |

**Table S3** Comparison of the ORR performances of Co-N,O-C@C<sub>3</sub>N<sub>4</sub> with reported catalysts.

| Catalyst                                                           | $E_{1/2}$ (V) | Mass loading           | Reference |
|--------------------------------------------------------------------|---------------|------------------------|-----------|
|                                                                    |               | (mg cm <sup>-2</sup> ) |           |
| Co-N,O-C@C <sub>3</sub> N <sub>4</sub>                             | 0.84          | 0.39                   | This work |
| ZIFCNDA                                                            | 0.84          | 0.5                    | 11        |
| Co-SAs@NC                                                          | 0.82          | 0.612                  | 12        |
| Co-NC@CoP-NC                                                       | 0.78          | 0.28                   | 13        |
| Co-N <sub>x</sub> -C                                               | 0.8           | 0.25                   | 14        |
| ACTP5@Co <sub>3</sub> N-800                                        | 0.891         | 0.3                    | 15        |
| Co <sub>3</sub> O <sub>4</sub> -C <sub>3</sub> N <sub>4</sub> /rGO | 0.81          | 0.13                   | 16        |
| f-CoNC/GO                                                          | 0.86          | 0.31                   | 17        |
| Co@Co <sub>3</sub> O <sub>4</sub> /NC-2                            | 0.74          | 0.21                   | 18        |
| Co-CoO/N-rGO                                                       | 0.78          | 0.21                   | 19        |
| C-MOF-C2-900                                                       | 0.817         | 0.2                    | 20        |

**Table S4** Comparison of the rechargeable Zn-air Battery performance of Co-N,O-C@C<sub>3</sub>N<sub>4</sub> with reported catalysts.

| Catalyst                                | Electrolyte                           | Power density (mW cm <sup>-2</sup> ) | Open-circuit voltage (V) | Reference |
|-----------------------------------------|---------------------------------------|--------------------------------------|--------------------------|-----------|
| Co-N,O-C@C <sub>3</sub> N <sub>4</sub>  | 6.0 M KOH + 0.2 M Zn(Ac) <sub>2</sub> | 112                                  | 1.43                     | This work |
| Pt/C+RuO <sub>2</sub>                   | 6.0 M KOH + 0.2 M Zn(Ac) <sub>2</sub> | 92                                   | 1.39                     | This work |
| ZIFCNDA                                 | 6.0 M KOH + 0.1 M ZnCl <sub>2</sub>   | 57                                   | 1.14                     | 11        |
| Co-SAs@NC                               | 6.0 M KOH + 0.2 M ZnCl <sub>2</sub>   | 105.3                                | 1.46                     | 12        |
| f-CoNC/GO                               | 6.0 M KOH + 1 M Zn(OAc) <sub>2</sub>  | 152                                  | 1.38                     | 17        |
| C-MOF-C2-900                            | 6.0 M KOH + 0.2 M Zn(Ac) <sub>2</sub> | 105                                  | 1.28                     | 20        |
| Co-N-CNTs                               | 6.0 M KOH + 0.2 M Zn(Ac) <sub>2</sub> | 101                                  | 1.365                    | 21        |
| Co <sub>3</sub> O <sub>4-x</sub> @N-C-2 | 6.0 M KOH + 0.2 M Zn(Ac) <sub>2</sub> | 105.2                                | 1.524                    | 22        |
| Co@CNT/MS                               | 6.0 M KOH + 0.2 M Zn(Ac) <sub>2</sub> | 128.6                                | 1.46                     | 23        |
| HMT-Co@SiO <sub>2</sub> -900            | 6.0 M KOH + 0.2 M Zn(Ac) <sub>2</sub> | 80.17                                | 1.417                    | 24        |

## References

1. B. K. Kang, S. Y. Im, J. Lee, S. H. Kwag, S. B. Kwon, S. Tiruneh, M.-J. Kim, J. H. Kim, W. S. Yang, B. Lim and D. H. Yoon, *Nano Research*, 2019, **12**, 1605-1611.
2. D. Ding, K. Shen, X. Chen, H. Chen, J. Chen, T. Fan, R. Wu and Y. Li, *ACS Catal.*, 2018, **8**, 7879-7888.
3. Z. Yang, C. Zhao, Y. Qu, H. Zhou, F. Zhou, J. Wang, Y. Wu and Y. Li, *Adv. Mater.*, 2019, **31**, 1808043.
4. C.-Z. Yuan, S.-L. Zhong, Y.-F. Jiang, Z. K. Yang, Z.-W. Zhao, S.-J. Zhao, N. Jiang and A.-W. Xu, *J. Mater. Chem. A*, 2017, **5**, 10561-10566.
5. H. Guo, Q. Feng, J. Zhu, J. Xu, Q. Li, S. Liu, K. Xu, C. Zhang and T. Liu, *J. Mater. Chem. A*, 2019, **7**, 3664-3672.
6. K. Dai, N. Zhang, L. Zhang, L. Yin, Y. Zhao and B. Zhang, *Chem. Eng. J.*, 2021, **414**, 128804.
7. T. Sun, P. Liu, Y. Zhang, Z. Chen, C. Zhang, X. Guo, C. Ma, Y. Gao and S. Zhang, *Chem. Eng. J.*, 2020, **390**, 124591.



8. S. Dou, C.-L. Dong, Z. Hu, Y.-C. Huang, J.-l. Chen, L. Tao, D. Yan, D. Chen, S. Shen, S. Chou and S. Wang, *Adv. Funct. Mater.*, 2017, **27**, 1702546.
9. K. Karuppasamy, R. Bose, D. Vikraman, S. Ramesh, H. S. Kim, E. Alhseinat, A. Alfantazi and H.-S. Kim, *J. Alloys Compd.*, 2023, **934**, 167909.
10. C. Tang, M. Ramírez-Hernández, B. Thomas, Y.-W. Yeh, P. E. Batson and T. Asefa, *Small Methods*, 2022, **6**, 2200519.
11. B. J. Ferraz, J. Kong, B. Li, N. Neng Tham, C. Blackman and Z. Liu, *J. Electroanal. Chem.*, 2022, **921**, 116702.
12. X. Han, X. Ling, Y. Wang, T. Ma, C. Zhong, W. Hu and Y. Deng, *Angew. Chem. Int. Ed.*, 2019, **58**, 5359-5364.
13. X. Li, Q. Jiang, S. Dou, L. Deng, J. Huo and S. Wang, *J. Mater. Chem. A*, 2016, **4**, 15836-15840.
14. C. Tang, B. Wang, H.-F. Wang and Q. Zhang, *Adv. Mater.*, 2017, **29**, 1703185.
15. J. Zhang, T. Zhang, J. Ma, Z. Wang, J. Liu and X. Gong, *Carbon*, 2021, **172**, 556-568.
16. L. Gong, X. Li, Q. Zhang, B. Huang, Q. Yang, G. Yang and Y. Liu, *Appl. Surf. Sci.*, 2020, **525**, 146624.
17. Y. Jia, Y. Wang, G. Zhang, C. Zhang, K. Sun, X. Xiong, J. Liu and X. Sun, *J. Energy Chem.*, 2020, **49**, 283-290.
18. A. Aijaz, J. Masa, C. Rösler, W. Xia, P. Weide, A. J. R. Botz, R. A. Fischer, W. Schuhmann and M. Muhler, *Angew. Chem. Int. Ed.*, 2016, **55**, 4087-4091.
19. X. Liu, W. Liu, M. Ko, M. Park, M. G. Kim, P. Oh, S. Chae, S. Park, A. Casimir, G. Wu and J. Cho, *Adv. Funct. Mater.*, 2015, **25**, 5799-5808.
20. M. Zhang, Q. Dai, H. Zheng, M. Chen and L. Dai, *Adv. Mater.*, 2018, **30**, 1705431.
21. T. Wang, Z. Kou, S. Mu, J. Liu, D. He, I. S. Amiin, W. Meng, K. Zhou, Z. Luo, S. Chaemchuen and F. Verpoort, *Adv. Funct. Mater.*, 2018, **28**, 1705048.
22. Y. Wang, R. Gan, Z. Ai, H. Liu, C. Wei, Y. Song, M. Dirican, X. Zhang, C. Ma and J. Shi, *Carbon*, 2021, **181**, 87-98.
23. C. Xiao, J. Luo, M. Tan, Y. Xiao, B. Gao, Y. Zheng and B. Lin, *J. Power Sources*, 2020, **453**, 227900.
24. X. Zhang, J. Xu and L. Wu, *Mater. Today Sustain.*, 2022, **19**, 100180.
